# Supplementary material for: PAICS, a De Novo Purine Biosynthetic Enzyme, Is Overexpressed in Pancreatic Cancer and Is Involved in Its Progression
Source: PubMed Central journal article supplement — Transl Oncol. 2020 May 15;13(7):100776. doi: 10.1016/j.tranon.2020.100776 (PMC7229293; doi:10.1016/j.tranon.2020.100776), 2020-05-15

# Supplementary Figure S1

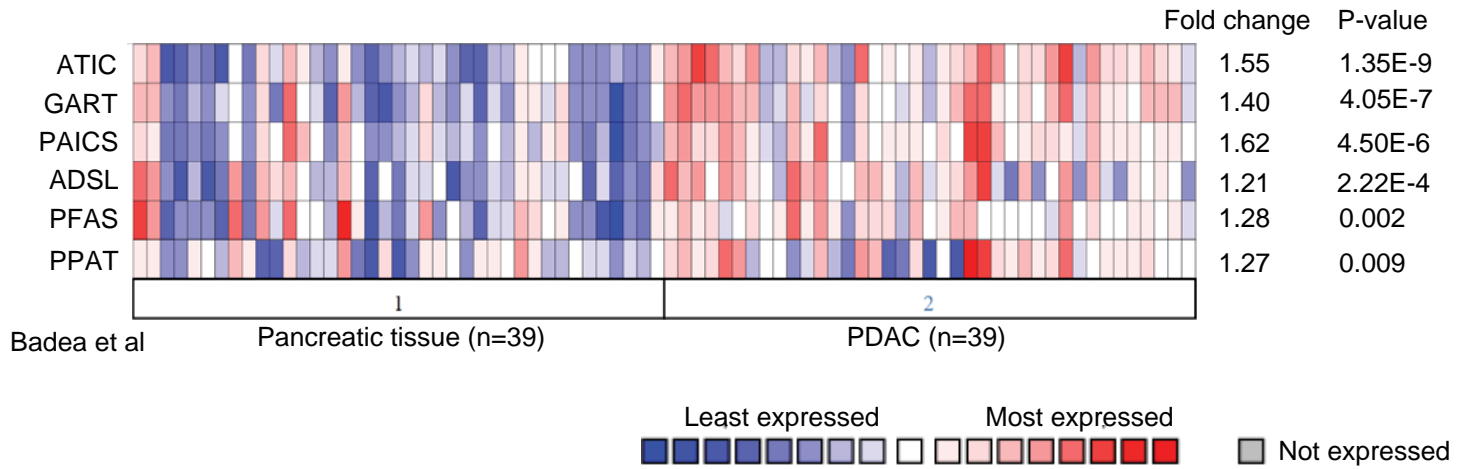

# Supplementary Figure S2

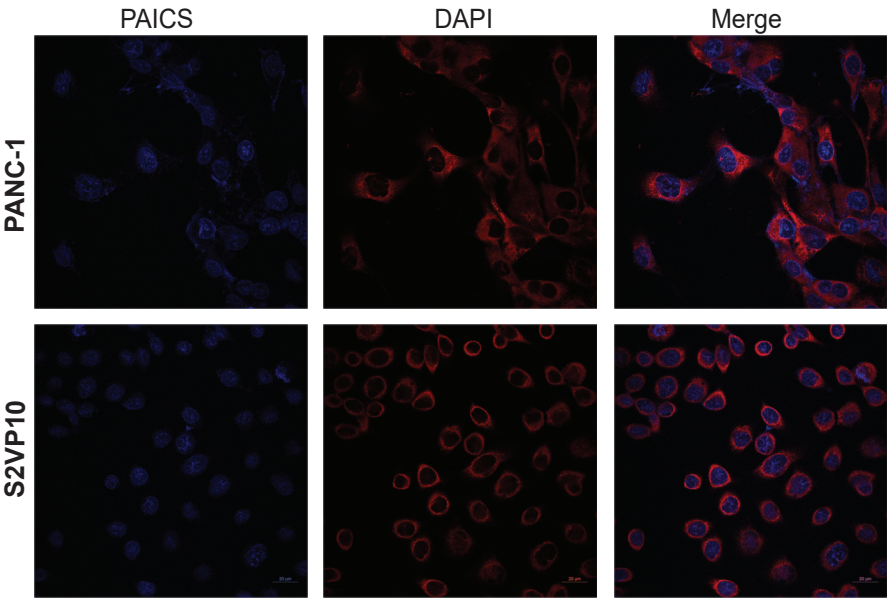

# Supplementary Figure S3

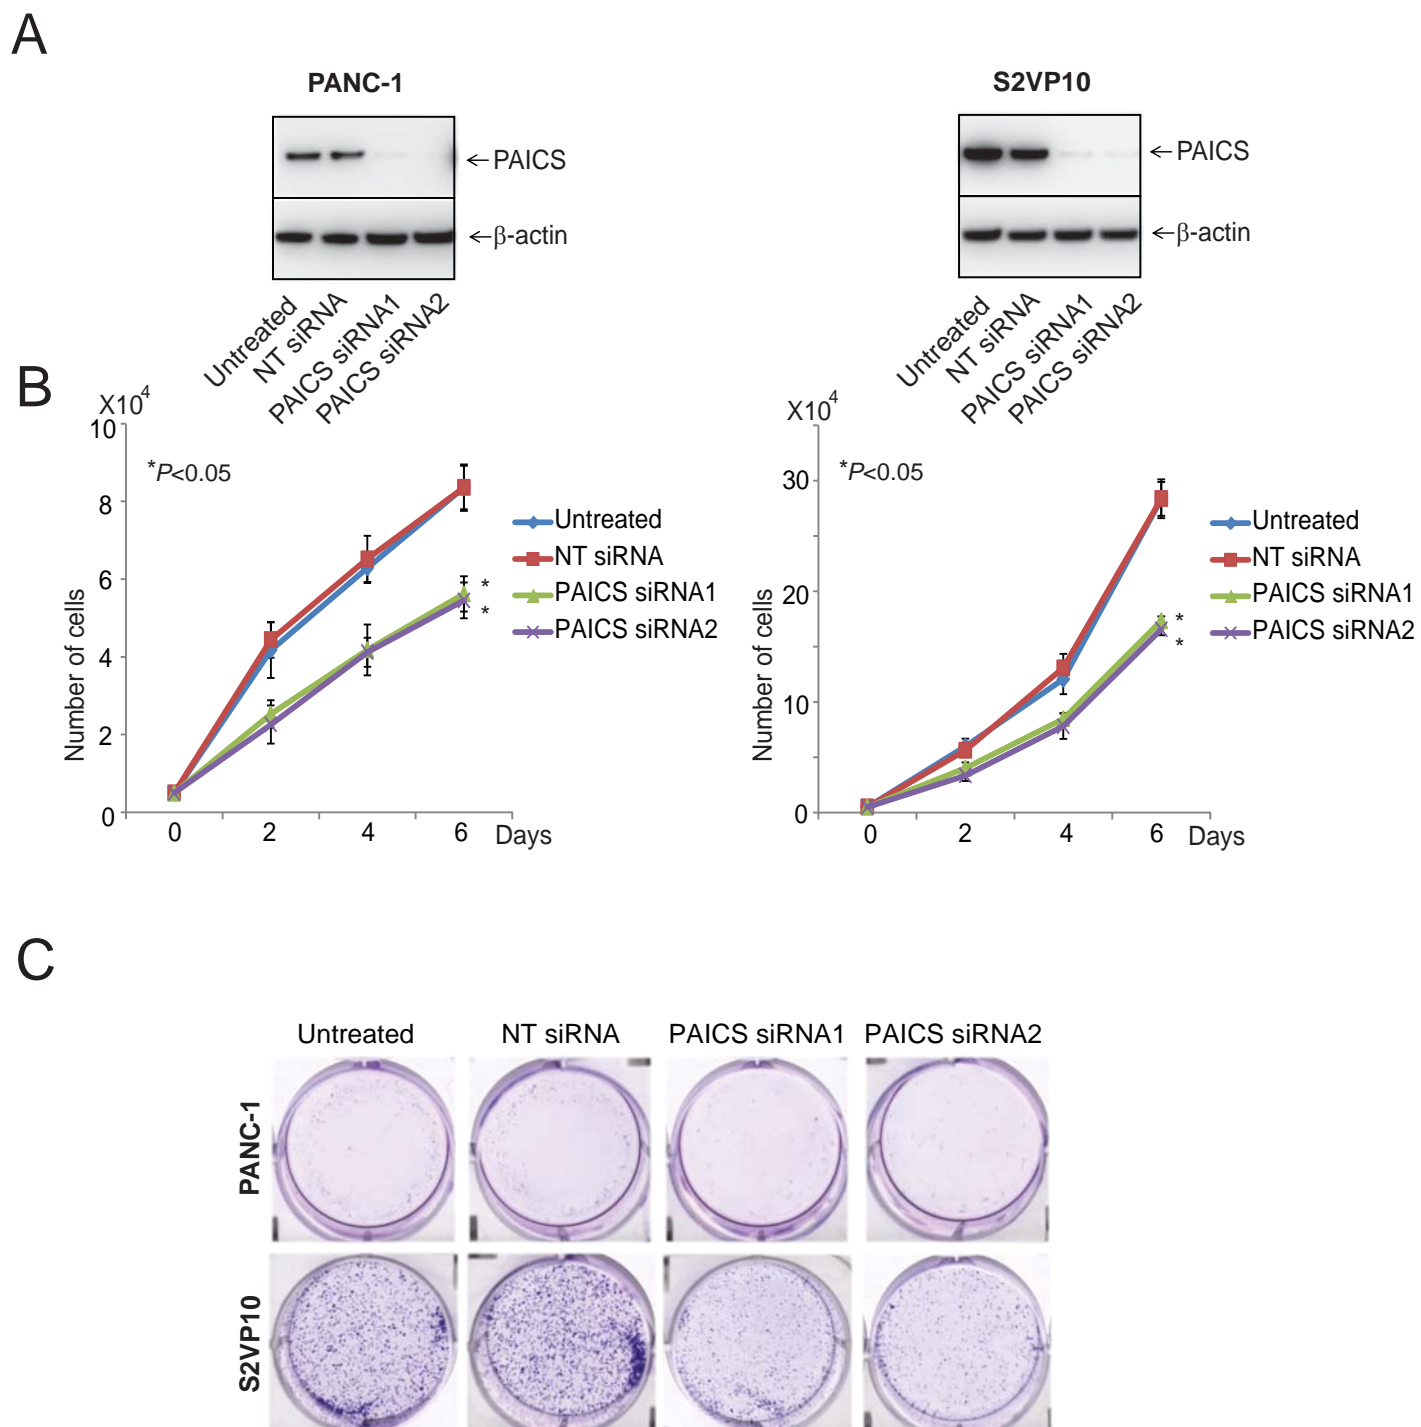

# Supplementary Figure S4

**A**

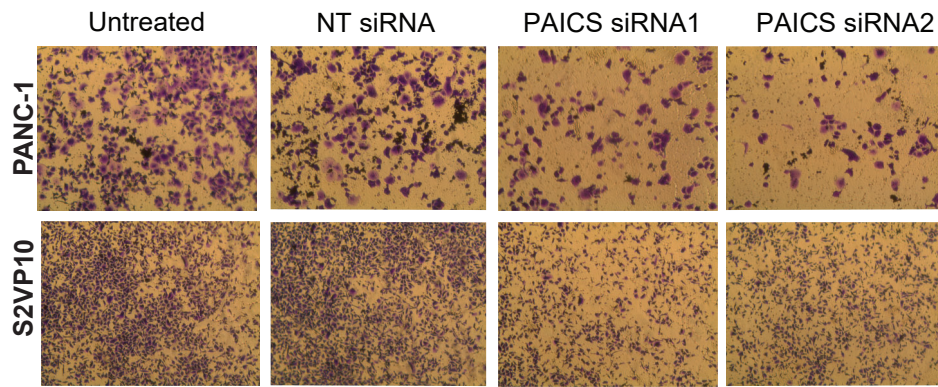

**B**

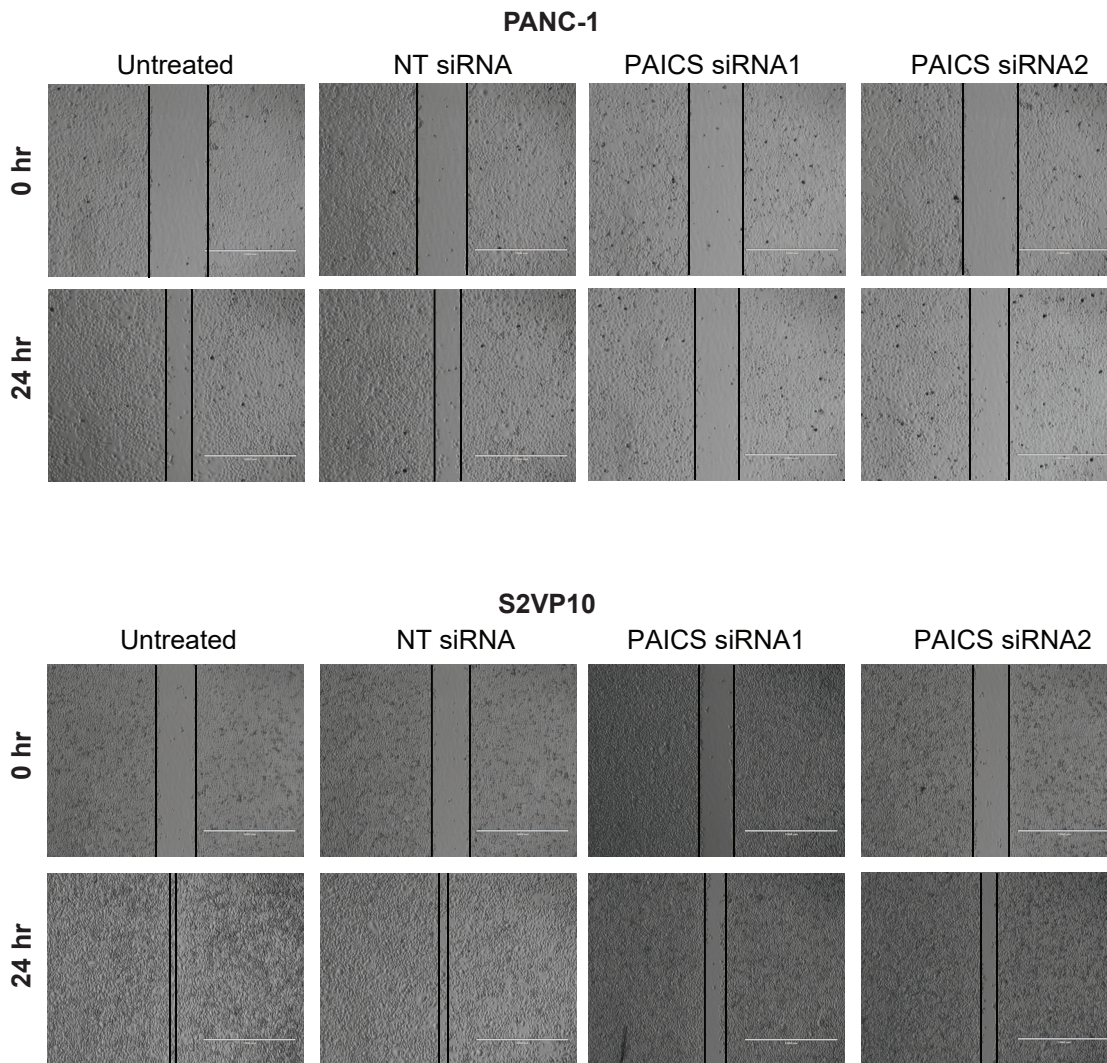

# Supplementary Figure S5

A

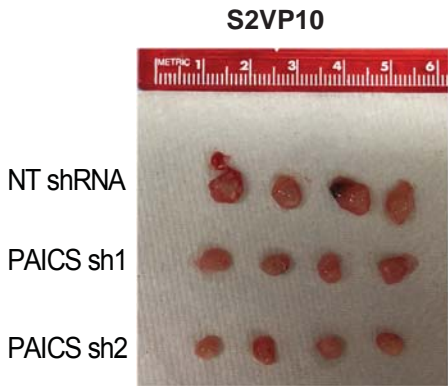

B

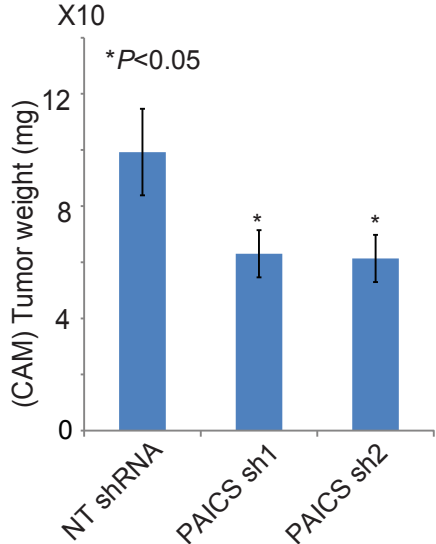

C

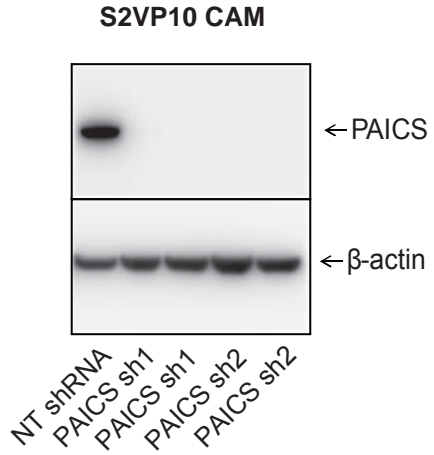

Supplement: mmc1.pdf [file mmc1.pdf]
